# Supplementary material for: Effect of functional groups on dielectric, optical gas sensing properties of graphene oxide and reduced graphene oxide at room temperature
Source: Royal Society of Chemistry journal article supplement (doi:10.1039/c4ra12766h), 2015-01-01
Supplement: c4ra12766h1.pdf [file c4ra12766h1.pdf]

## Supplementary Information

### Effect of Functional Groups on Dielectric, Optical Gas Sensing Properties of Graphene Oxide and Reduced Graphene Oxide at Room Temperature

T. Kavinkumar<sup>a</sup>, D. Sastikumar<sup>b</sup> and S. Manivannan<sup>\*a</sup>

<sup>a</sup>Carbon Nanomaterials Laboratory, Department of Physics,  
National Institute of Technology, Tiruchirappalli- 620 015, India.

<sup>b</sup>Department of Physics, National Institute of Technology, Tiruchirappalli 620 015, India

\*Corresponding author's email:ksmani@nitt.edu, ksmaniphysics@yahoo.com

Tel.: +91-431-2503616, Fax: +91-431-2500133

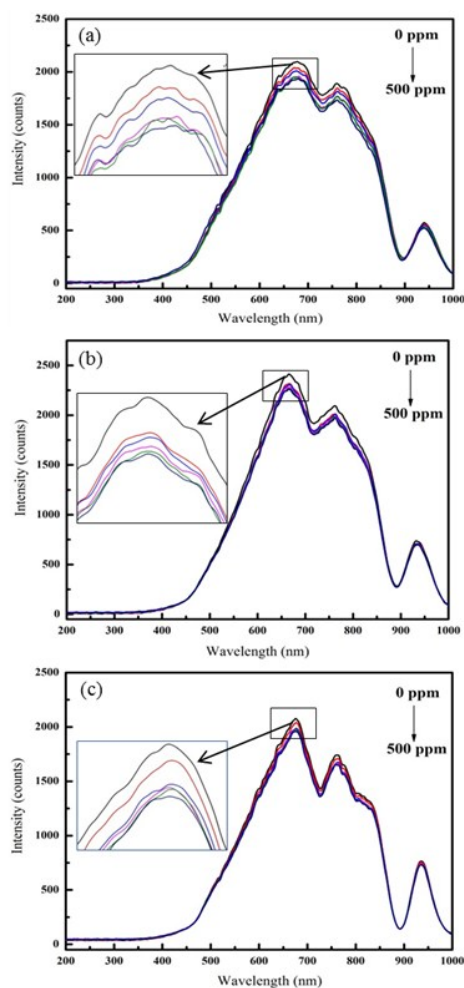

SI.1 Spectral response of GO for (a) ammonia (b) ethanol and (c) methanol.

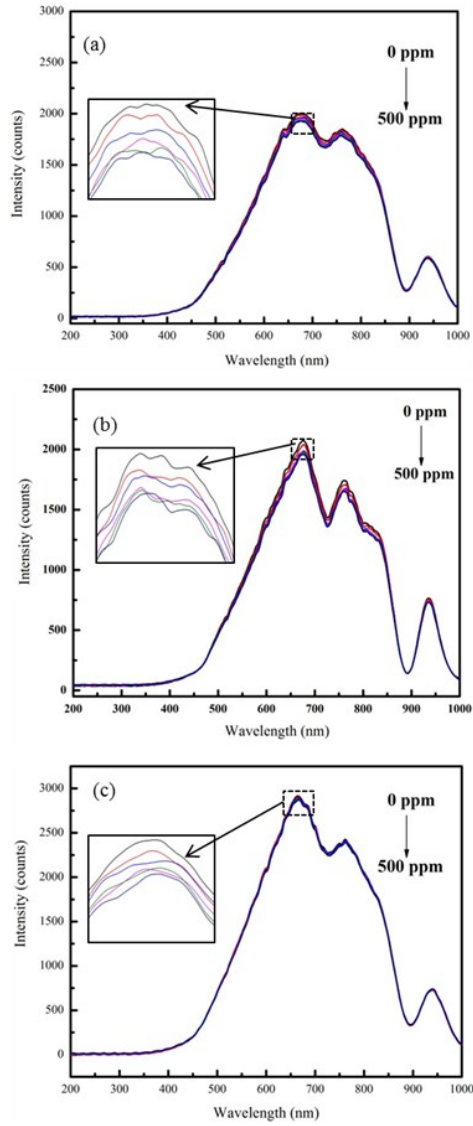

**SI.2** Spectral response of GO<sub>110</sub> for (a) ammonia (b) ethanol and (c) methanol.

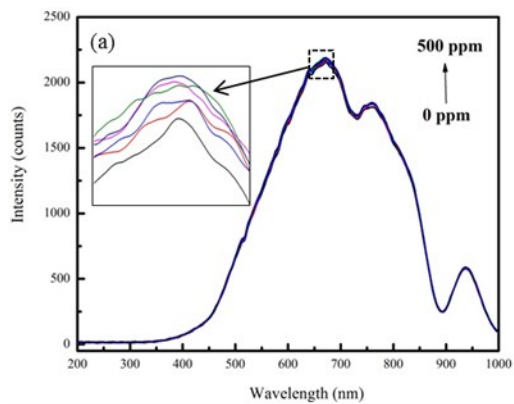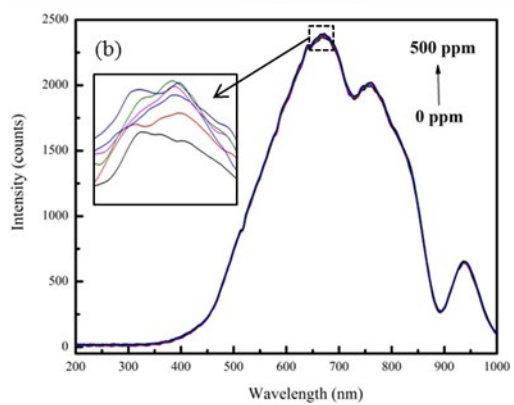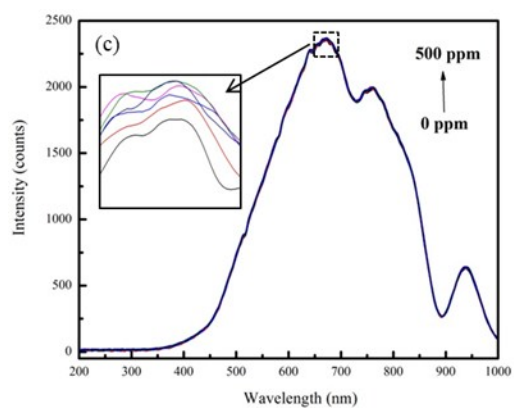

**SI.3** Spectral response of GO<sub>220</sub> for (a) ammonia (b) ethanol and (c) methanol.
